# Supplementary material for: Irida-graphene phonon thermal transport via non-equilibrium molecular dynamics simulations
Source: Royal Society of Chemistry journal article supplement (doi:10.1039/d4nr02669a), 2024-01-01
Supplement: d4nr02669a1.pdf [file d4nr02669a1.pdf]

## Supplementary Information for Phonon Thermal Transport in Irida-Graphene via Non-equilibrium Molecular Dynamics Simulations

Isaac M. Felix,<sup>1</sup> Raphael M. Tromer,<sup>2</sup> Leonardo D. Machado,<sup>3</sup> Douglas  
S. Galvão,<sup>4</sup> Luiz A. Ribeiro Junior,<sup>5</sup> and Marcelo L. Pereira Junior<sup>6</sup>

<sup>1</sup>*Department of Physics, Federal University of Pernambuco, Recife, Pernambuco, Brazil.*

<sup>2</sup>*School of Engineering, MackGraphe, Mackenzie Presbyterian University, São Paulo, São Paulo, Brazil.*

<sup>3</sup>*Department of Physics, Federal University of Rio Grande do Norte, Natal, Rio Grande do Norte, Brazil.*

<sup>4</sup>*Department of Applied Physics, State University of Campinas, Campinas, São Paulo, Brazil.*

<sup>5</sup>*University of Brasília, Institute of Physics, Brasília, Federal District, Brazil.*

<sup>6</sup>*University of Brasília, College of Technology,  
Department of Electrical Engineering, Brasília, Federal District, Brazil.*

### I. LATTICE THERMAL CONDUCTIVITY OF GRAPHENE WITH REBO POTENTIAL

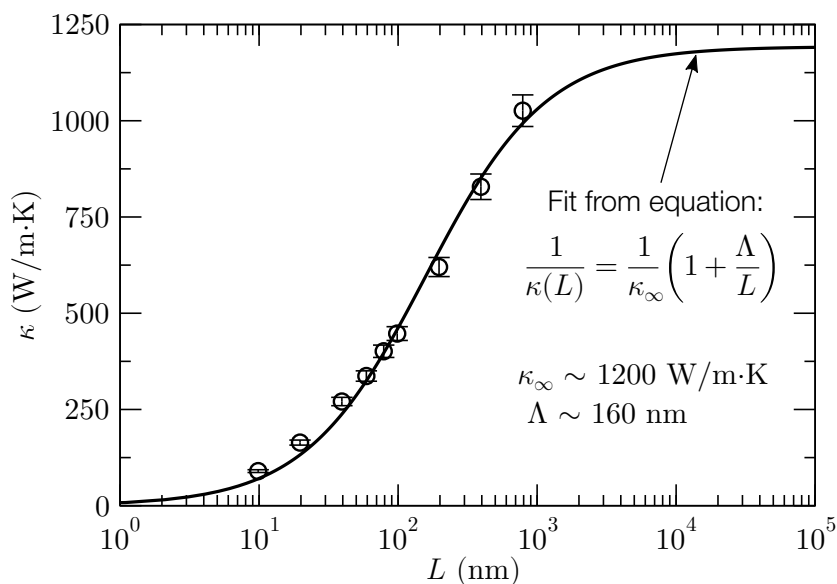

FIG. S1. Thermal conductivity of graphene as a function of sample length using the second-generation REBO potential. Data points are from RNEMD simulations, and lines are from Eq. (4) of the main text.

Figure S1 shows the thermal conductivity as a function of the graphene system length obtained using the second-generation REBO potential [1]. This value falls within the range of other molecular dynamics simulation results that used the same potential to calculate the thermal conductivity of graphene [2, 3], but it is lower than experimental results ( $\sim 1500 - 5800 \text{ W/mK}$ ) [4–8]. This is likely

due to the fact that the REBO potential does not reproduce the optical phonons correctly [9, 10], which would change the phase space for phonon-phonon scattering and thus change the phonon relaxation time [11, 12].

- 
- [1] Donald W Brenner, Olga A Shenderova, Judith A Harrison, Steven J Stuart, Boris Ni, and Susan B Sinnott. A second-generation reactive empirical bond order (REBO) potential energy expression for hydrocarbons. *J. Phys.: Condens. Matter.*, 14(4):783, 2002.
- [2] Xin Mu, Xufei Wu, Teng Zhang, David B Go, and Tengfei Luo. Thermal transport in graphene oxide—from ballistic extreme to amorphous limit. *Sci. Rep.*, 4(1):3909, 2014.
- [3] Giuliana Barbarino, Claudio Melis, and Luciano Colombo. Intrinsic thermal conductivity in monolayer graphene is ultimately upper limited: A direct estimation by atomistic simulations. *Phys. Rev. B*, 91(3):035416, 2015.
- [4] Alexander A Balandin, Suchismita Ghosh, Wenzhong Bao, Irene Calizo, Desalegne Teweldebrhan, Feng Miao, and Chun Ning Lau. Superior thermal conductivity of single-layer graphene. *Nano Lett.*, 8(3):902–907, 2008.
- [5] Suchismita Ghosh, Irene Calizo, Desalegne Teweldebrhan, Evghenii P Pokatilov, Denis L Nika, Alexander A Balandin, Wenzhong Bao, Feng Miao, and C Ning Lau. Extremely high thermal conductivity of graphene: Prospects for thermal management applications in nanoelectronic circuits. *Appl. Phys. Lett.*, 92(15), 2008.
- [6] Clement Faugeras, Blaise Faugeras, Milan Orlita, Marek Potemski, Rahul R Nair, and AK Geim. Thermal conductivity of graphene in corbino membrane geometry. *ACS nano*, 4(4):1889–1892, 2010.
- [7] Weiwei Cai, Arden L Moore, Yanwu Zhu, Xuesong Li, Shanshan Chen, Li Shi, and Rodney S Ruoff. Thermal transport in suspended and supported monolayer graphene grown by chemical vapor deposition. *Nano Lett.*, 10(5):1645–1651, 2010.
- [8] Jae-Ung Lee, Duhee Yoon, Hakseong Kim, Sang Wook Lee, and Hyeonsik Cheong. Thermal conductivity of suspended pristine graphene measured by raman spectroscopy. *Phys. Rev. B*, 83(8):081419, 2011.
- [9] Patrick Rowe, Gábor Csányi, Dario Alfe, and Angelos Michaelides. Development of a machine learning potential for graphene. *Phys. Rev. B*, 97(5):054303, 2018.
- [10] Mingjian Wen and Ellad B Tadmor. Uncertainty quantification in molecular simulations with dropout neural network potentials. *npj Comput. Mater.*, 6(1):124, 2020.
- [11] J.M. Ziman. *Electrons and Phonons: The Theory of Transport Phenomena in Solids*. Oxford University Press, 02 2001.
- [12] Denis L Nika and Alexander A Balandin. Two-dimensional phonon transport in graphene. *J. Phys.: Condens. Matter*, 24(23):233203, 2012.
